# Supplementary material for: The Impact of Zoning Designations on Bird Communities: A Case Study of National Nature Reserves in Guangdong Province
Source: MDPI journal article supplement (doi:10.3390/d16040222), 2024-04-07

Table S1. General information about each reserve and the elevation of sample sites used for the study.

|                                      | Feature                | Chebaling<br>National Nature<br>Reserve                                                                                              | Nanling National Nature<br>Reserve                                                                                                                                                                                                                | Shimentai<br>National Nature<br>Reserve                                                                                                     | Xiangtou<br>Mountain<br>National Nature<br>Reserve                                                         | Yunkai Mountain<br>National Nature<br>Reserve                                                        |
|--------------------------------------|------------------------|--------------------------------------------------------------------------------------------------------------------------------------|---------------------------------------------------------------------------------------------------------------------------------------------------------------------------------------------------------------------------------------------------|---------------------------------------------------------------------------------------------------------------------------------------------|------------------------------------------------------------------------------------------------------------|------------------------------------------------------------------------------------------------------|
| General<br>information               | Flagship species       | White-eared<br>Night-heron<br>( <i>Gorsachius<br/>magnificus</i> ),<br>Yellow-breasted<br>Bunting<br>( <i>Emberiza<br/>aureola</i> ) | Mangshan Pit Viper<br>( <i>Protobothrops<br/>mangshanensis</i> ), Cabot's<br>Tragopan ( <i>Tragopan<br/>caboti</i> ), White-eared<br>Night-heron ( <i>Gorsachius<br/>magnificus</i> ), Yellow-<br>breasted Bunting<br>( <i>Emberiza aureola</i> ) | Yingde Leopard<br>Gecko<br>( <i>Goniurosaurus<br/>yingdeensis</i> ),<br>White-eared<br>Night-heron<br>( <i>Gorsachius<br/>magnificus</i> ), | Golden Eagle<br>( <i>Aquila<br/>chrysaetos</i> ),<br>Chinese Pangolin<br>( <i>Manis<br/>pentadactyla</i> ) | Red Junglefowl<br>( <i>Gallus gallus</i> ),<br>Chinese Pangolin<br>( <i>Manis<br/>pentadactyla</i> ) |
|                                      | *Mean temperature (°C) | 19.6                                                                                                                                 | 17.7                                                                                                                                                                                                                                              | 20.9                                                                                                                                        | 21.8                                                                                                       | 17                                                                                                   |
|                                      | Highest peak (m)       | 1260                                                                                                                                 | 1900                                                                                                                                                                                                                                              | 1580                                                                                                                                        | 1020                                                                                                       | 1700                                                                                                 |
|                                      | Area_total (hectare)   | 7540                                                                                                                                 | 58590                                                                                                                                                                                                                                             | 33560                                                                                                                                       | 10700                                                                                                      | 12510                                                                                                |
|                                      | Area_core zone         | 2510                                                                                                                                 | 27670                                                                                                                                                                                                                                             | 13920                                                                                                                                       | 3640                                                                                                       | 4860                                                                                                 |
|                                      | Area_buffer zone       | 2110                                                                                                                                 | 13820                                                                                                                                                                                                                                             | 8860                                                                                                                                        | 4000                                                                                                       | 3610                                                                                                 |
|                                      | Area_experimental zone | 2920                                                                                                                                 | 17100                                                                                                                                                                                                                                             | 10780                                                                                                                                       | 3060                                                                                                       | 4040                                                                                                 |
| Elevation of<br>sample points<br>(m) | Mean                   | 417.1                                                                                                                                | 858                                                                                                                                                                                                                                               | 429.7                                                                                                                                       | 496.5                                                                                                      | 1131                                                                                                 |
|                                      | SD                     | 80.7                                                                                                                                 | 373.5                                                                                                                                                                                                                                             | 134.4                                                                                                                                       | 290.1                                                                                                      | 172.3                                                                                                |
|                                      | Min                    | 341                                                                                                                                  | 409                                                                                                                                                                                                                                               | 190                                                                                                                                         | 48                                                                                                         | 763                                                                                                  |
|                                      | Max                    | 630                                                                                                                                  | 1373                                                                                                                                                                                                                                              | 680                                                                                                                                         | 846                                                                                                        | 1362                                                                                                 |

\* Mean annual temperature

Table S2. List of bird species and their traits. Mean abn represents mean abundance per point and # of sites is the number of paired points where species was detected across all surveys.

| Common name                      | Scientific name                   | Body mass (g) | Migratory status | Diet <sup>1</sup>       | Foraging | # of sites | Mean abn |
|----------------------------------|-----------------------------------|---------------|------------------|-------------------------|----------|------------|----------|
| Asian Black Bulbul               | <i>Hypsipetes leucocephalus</i>   | 51.8          | Resident         | Omnivorous <sup>2</sup> | High     | 41         | 7.189    |
| Asian Dollarbird                 | <i>Eurystomus orientalis</i>      | 143.02        | Resident         | Invertebrate            | Low      | 4          | 0.216    |
| Barred Cuckoo-dove               | <i>Macropygia unchall</i>         | 168           | Resident         | PlantSeed               | High     | 5          | 0.068    |
| Bay Woodpecker                   | <i>Blythipicus pyrrhotis</i>      | 132           | Resident         | Invertebrate            | Low      | 15         | 0.284    |
| Bianchi's Warbler                | <i>Seicercus valentini</i>        | 7.3           | Migrant          | Invertebrate            | High     | 2          | 0.054    |
| Black Baza                       | <i>Aviceda leuphotes</i>          | 193.98        | Resident         | Invertebrate            | Low      | 2          | 0.108    |
| Black Kite                       | <i>Milvus migrans</i>             | 734.1         | Migrant          | Verterbrate             | Ground   | 4          | 0.068    |
| Black-browed Barbet              | <i>Megalaima oorti</i>            | 87.69         | Resident         | Fruit/Nectar            | High     | 31         | 0.743    |
| Black-necklaced Scimitar-babbler | <i>Pomatorhinus erythrocnemis</i> | 58.15         | Resident         | Invertebrate            | Ground   | 14         | 0.311    |
| Black-throated Laughingthrush    | <i>Garrulax chinensis</i>         | 78.64         | Resident         | Invertebrate            | Low-high | 3          | 0.068    |
| Black-throated Tit               | <i>Aegithalos concinnus</i>       | 6.1           | Resident         | Invertebrate            | Low      | 5          | 0.649    |
| Blue Magpie                      | <i>Urocissa erythrorhyncha</i>    | 151.52        | Resident         | Omnivorous              | Low-high | 16         | 0.486    |
| Blue Whistling-thrush            | <i>Myophonus caeruleus</i>        | 157.98        | Migrant          | Invertebrate            | Ground   | 10         | 0.135    |
| Brownish-flanked Bush-warbler    | <i>Cettia fortipes</i>            | 9.59          | Resident         | Invertebrate            | Low      | 10         | 0.338    |
| Chestnut Bulbul                  | <i>Hemixos castanonotus</i>       | 38            | Resident         | Omnivorous              | High     | 72         | 6.73     |
| Chestnut-bellied Rock-thrush     | <i>Monticola rufiventris</i>      | 53.2          | Resident         | Invertebrate            | Ground   | 2          | 0.041    |
| Chestnut-crowned Warbler         | <i>Seicercus castaniceps</i>      | 5.3           | Migrant          | Invertebrate            | High     | 2          | 0.081    |
| Chestnut-winged Cuckoo           | <i>Clamator coromandus</i>        | 74.59         | Resident         | Invertebrate            | High     | 5          | 0.095    |
| Chinese Bamboo-partridge         | <i>Bambusicola thoracicus</i>     | 264.79        | Resident         | PlantSeed               | Ground   | 8          | 0.23     |
| Chinese Goshawk                  | <i>Accipiter soloensis</i>        | 164.77        | Migrant          | Verterbrate             | Ground   | 3          | 0.054    |
| Chinese Hwamei                   | <i>Garrulax canorus</i>           | 62.78         | Resident         | Invertebrate            | Ground   | 6          | 0.162    |
| Collared Finchbill               | <i>Spizixos semitorques</i>       | 39            | Resident         | Omnivorous              | High     | 7          | 0.459    |
| Collared Owlet                   | <i>Glaucidium brodiei</i>         | 59.39         | Resident         | Verterbrate             | Ground   | 4          | 0.054    |
| Common Kingfisher                | <i>Alcedo atthis</i>              | 31.09         | Resident         | Verterbrate             | Ground   | 2          | 0.027    |

| Common name                      | Scientific name                 | Body mass (g) | Migratory status | Diet <sup>1</sup> | Foraging | # of sites | Mean abn |
|----------------------------------|---------------------------------|---------------|------------------|-------------------|----------|------------|----------|
| Common Pheasant                  | <i>Phasianus colchicus</i>      | 1120.31       | Resident         | PlantSeed         | Ground   | 2          | 0.027    |
| Common Tailorbird                | <i>Orthotomus sutorius</i>      | 7.5           | Resident         | Invertebrate      | Low      | 12         | 0.23     |
| Crested Serpent-eagle            | <i>Spilornis cheela</i>         | 597.74        | Resident         | Vertebrate        | Ground   | 4          | 0.054    |
| Daurian Redstart                 | <i>Phoenicurus aureus</i>       | 16.2          | Migrant          | Invertebrate      | Low      | 4          | 0.068    |
| Dusky Fulvetta                   | <i>Alcippe brunnea</i>          | 17.43         | Resident         | Invertebrate      | Low      | 14         | 0.324    |
| Dusky Warbler                    | <i>Phylloscopus fuscatus</i>    | 8.74          | Migrant          | Invertebrate      | Low-high | 3          | 0.054    |
| Fire-breasted Flowerpecker       | <i>Dicaeum ignipectus</i>       | 5.72          | Resident         | Fruit/Nectar      | High     | 5          | 0.108    |
| Fork-tailed Sunbird              | <i>Aethopyga christinae</i>     | 5.2           | Resident         | Fruit/Nectar      | Low-high | 34         | 0.784    |
| Great Barbet                     | <i>Megalaima virens</i>         | 202           | Resident         | Fruit/Nectar      | Low      | 21         | 0.486    |
| Great Tit                        | <i>Parus major</i>              | 16.25         | Resident         | Omnivorous        | High     | 20         | 0.473    |
| Greater Necklaced Laughingthrush | <i>Garrulax pectoralis</i>      | 145.12        | Resident         | Invertebrate      | Ground   | 20         | 1.514    |
| Grey Laughingthrush              | <i>Garrulax maesi</i>           | 78.64         | Resident         | Invertebrate      | Ground   | 3          | 0.135    |
| Grey Treepie                     | <i>Dendrocitta formosae</i>     | 102.74        | Resident         | Omnivorous        | Low-high | 20         | 0.811    |
| Grey-capped Woodpecker           | <i>Dendrocopos canicapillus</i> | 25.76         | Resident         | Invertebrate      | High     | 4          | 0.068    |
| Grey-cheeked Fulvetta            | <i>Alcippe morrisonia</i>       | 15.26         | Migrant          | Invertebrate      | High     | 65         | 9.095    |
| Grey-chinned Minivet             | <i>Pericrocotus solaris</i>     | 14.5          | Resident         | Invertebrate      | High     | 17         | 2.068    |
| Grey-faced Woodpecker            | <i>Picus canus</i>              | 137           | Resident         | Invertebrate      | Ground   | 4          | 0.054    |
| Hainan Blue-flycatcher           | <i>Cyornis hainanus</i>         | 26.84         | Migrant          | Invertebrate      | High     | 3          | 0.068    |
| Hair-crested Drongo              | <i>Dicrurus hottentottus</i>    | 79.19         | Migrant          | Invertebrate      | High     | 3          | 0.243    |
| Hill Prinia                      | <i>Prinia atrogularis</i>       | 11.8          | Resident         | Invertebrate      | Low      | 4          | 0.095    |
| Inornate Warbler                 | <i>Phylloscopus inornatus</i>   | 6.59          | Migrant          | Invertebrate      | High     | 3          | 0.108    |
| Japanese White-eye               | <i>Zosterops japonicus</i>      | 11.29         | Resident         | Fruit/Nectar      | High     | 18         | 1.919    |
| Large Hawk-cuckoo                | <i>Cuculus sparverioides</i>    | 151           | Migrant          | Invertebrate      | High     | 13         | 0.189    |
| Large-billed Crow                | <i>Corvus macrorhynchos</i>     | 513.14        | Resident         | Omnivorous        | Ground   | 16         | 0.514    |
| Lemon-rumped Warbler             | <i>Phylloscopus proregulus</i>  | 6             | Migrant          | Invertebrate      | Low-high | 12         | 0.662    |
| Lesser Necklaced Laughingthrush  | <i>Garrulax monileger</i>       | 83.7          | Resident         | Omnivorous        | Ground   | 6          | 0.27     |
| Lesser Shortwing                 | <i>Brachypteryx leucophrys</i>  | 15.8          | Resident         | Invertebrate      | Ground   | 7          | 0.108    |

| Common name                      | Scientific name                   | Body mass (g) | Migratory status | Diet <sup>1</sup> | Foraging | # of sites | Mean abn |
|----------------------------------|-----------------------------------|---------------|------------------|-------------------|----------|------------|----------|
| Light-vented Bulbul              | <i>Pycnonotus sinensis</i>        | 34.2          | Resident         | Omnivorous        | Low-high | 5          | 0.405    |
| Long-tailed Shrike               | <i>Lanius schach</i>              | 51.51         | Resident         | Invertebrate      | Ground   | 3          | 0.041    |
| Mountain Bulbul                  | <i>Hypsipetes mccllellandii</i>   | 32.5          | Resident         | Omnivorous        | Low-high | 31         | 1.297    |
| Mountain Tailorbird              | <i>Orthotomus cuculatus</i>       | 5.9           | Resident         | Invertebrate      | High     | 17         | 0.473    |
| Olive-backed Pipit               | <i>Anthus hodgsoni</i>            | 21.3          | Migrant          | Invertebrate      | Ground   | 2          | 0.135    |
| Orange-bellied Leafbird          | <i>Chloropsis hardwickii</i>      | 32.29         | Resident         | Fruit/Nectar      | Low-high | 5          | 0.108    |
| Orange-flanked Bush-robin        | <i>Tarsiger cyanurus</i>          | 13.43         | Migrant          | Invertebrate      | Low      | 6          | 0.135    |
| Oriental Magpie-robin            | <i>Copsychus saularis</i>         | 36            | Resident         | Invertebrate      | Ground   | 3          | 0.041    |
| Oriental Turtle-dove             | <i>Streptopelia orientalis</i>    | 232.94        | Resident         | PlantSeed         | Ground   | 2          | 0.027    |
| Plain Prinia                     | <i>Prinia inornata</i>            | 7             | Resident         | Invertebrate      | Low      | 2          | 0.068    |
| Pygmy Wren-babbler               | <i>Pnoepyga pusilla</i>           | 12            | Resident         | Invertebrate      | Ground   | 10         | 0.176    |
| Red-billed Leiothrix             | <i>Leiothrix lutea</i>            | 21.39         | Resident         | Invertebrate      | Low      | 28         | 1.973    |
| Red-headed Trogon                | <i>Harpactes erythrocephalus</i>  | 80.29         | Resident         | Invertebrate      | High     | 7          | 0.162    |
| Red-rumped Swallow               | <i>Hirundo daurica</i>            | 22.2          | Migrant          | Invertebrate      | High     | 3          | 1.486    |
| Red-whiskered Bulbul             | <i>Pycnonotus jocosus</i>         | 29.47         | Resident         | Omnivorous        | Low-high | 20         | 1.811    |
| Rufous-capped Babbler            | <i>Stachyris ruficeps</i>         | 10.3          | Resident         | Invertebrate      | High     | 33         | 1.541    |
| Scarlet Minivet                  | <i>Pericrocotus flammeus</i>      | 23.3          | Resident         | Invertebrate      | High     | 9          | 0.5      |
| Silver Pheasant                  | <i>Lophura nycthemera</i>         | 1230          | Resident         | Omnivorous        | Ground   | 6          | 0.135    |
| Slaty-backed Forktail            | <i>Enicurus schistaceus</i>       | 31            | Resident         | Invertebrate      | Ground   | 23         | 0.392    |
| Small Niltava                    | <i>Niltava macgregor</i>          | 11.95         | Resident         | Invertebrate      | Low      | 5          | 0.122    |
| Southern Blyth's Leaf-warbler    | <i>Phylloscopus reguloides</i>    | 7.63          | Migrant          | Invertebrate      | High     | 5          | 0.27     |
| Speckled Piculet                 | <i>Picumnus innominatus</i>       | 10.2          | Resident         | Invertebrate      | Low-high | 4          | 0.054    |
| Spotted Dove                     | <i>Stigmatopelia chinensis</i>    | 159           | Resident         | PlantSeed         | Ground   | 2          | 0.027    |
| Spotted Forktail                 | <i>Enicurus maculatus</i>         | 40.39         | Resident         | Invertebrate      | Ground   | 7          | 0.122    |
| Streak-breasted Scimitar-babbler | <i>Pomatorhinus ruficollis</i>    | 31.61         | Resident         | Invertebrate      | Low      | 40         | 0.973    |
| Striated Yuhina                  | <i>Yuhina castaniceps</i>         | 11.8          | Resident         | Invertebrate      | Low-high | 26         | 4.581    |
| Two-barred warbler               | <i>Phylloscopus plumbeitarsus</i> | 7.25          | Migrant          | Invertebrate      | Ground   | 3          | 0.068    |

| Common name                                          | Scientific name               | Body mass (g) | Migratory status | Diet <sup>1</sup> | Foraging | # of sites | Mean abn |
|------------------------------------------------------|-------------------------------|---------------|------------------|-------------------|----------|------------|----------|
| Verditer Flycatcher                                  | <i>Eumyias thalassinus</i>    | 18.1          | Migrant          | Invertebrate      | High     | 2          | 0.041    |
| White Wagtail                                        | <i>Motacilla alba</i>         | 23.93         | Resident         | Invertebrate      | Ground   | 2          | 0.027    |
| White-bellied Yuhina                                 | <i>Erpornis zantholeuca</i>   | 11.8          | Resident         | Invertebrate      | High     | 10         | 0.595    |
| White-browed Shrike-babbler<br>(Pied Shrike-babbler) | <i>Pteruthius flaviscapis</i> | 38.67         | Resident         | Invertebrate      | High     | 2          | 0.108    |
| White-necklaced Partridge                            | <i>Arborophila gingica</i>    | 253           | Resident         | Omnivorous        | Ground   | 5          | 0.149    |
| White-tailed Robin                                   | <i>Cinclidium leucurum</i>    | 26.83         | Resident         | Invertebrate      | Ground   | 2          | 0.027    |
| Yellow-bellied Prinia                                | <i>Prinia flaviventris</i>    | 7             | Resident         | Invertebrate      | Low      | 2          | 0.027    |
| Yellow-cheeked Tit                                   | <i>Parus spilonotus</i>       | 18.8          | Resident         | Invertebrate      | High     | 14         | 0.824    |

<sup>1</sup> Of diet traits, vertebrate was excluded from diet trait-level analysis. Although there are 5 species preying on vertebrates, they have different preference for prey type. In particular, one species (common kingfisher) is more specialized for fish and their habitat differs from all other species considered for analysis in this study.

<sup>2</sup> While Black bulbuls prefer fruits (40% of their diet), they also eat insects, seeds, and nectars (each 20%). For our analysis, we consider Black bulbuls as omnivores.

Table S3. Significance of associations between response (species richness and community weighted mean values of each trait) and explanatory variables. Zone represents the type of management zone (i.e., core, buffer, experimental, and boundary areas).

| Response         | Explanatory | Chisq  | Pr(>Chisq) |  | Response | Explanatory | Chisq  | Pr(>Chisq) |
|------------------|-------------|--------|------------|--|----------|-------------|--------|------------|
| Species richness | Elevation   | 0.281  | 0.596      |  | Ground   | Elevation   | 0.016  | 0.9        |
|                  | Zone        | 2.752  | 0.432      |  |          | Zone        | 2.682  | 0.443      |
|                  | Reserve     | 11.575 | 0.021      |  |          | Reserve     | 2.063  | 0.724      |
| Body mass        | Elevation   | 2.62   | 0.106      |  | Low      | Elevation   | 10.795 | 0.001      |
|                  | Zone        | 2.98   | 0.395      |  |          | Zone        | 5.066  | 0.167      |
|                  | Reserve     | 1.481  | 0.83       |  |          | Reserve     | 23.878 | <0.001     |
| Insect           | Elevation   | 1.131  | 0.288      |  | Low-high | Elevation   | 2.592  | 0.107      |
|                  | Zone        | 2.945  | 0.4        |  |          | Zone        | 3.509  | 0.32       |
|                  | Reserve     | 40.601 | <0.001     |  |          | Reserve     | 5.518  | 0.238      |
| Fruit/Nectar     | Elevation   | 5.479  | 0.019      |  | High     | Elevation   | 1.76   | 0.185      |
|                  | Zone        | 1.917  | 0.56       |  |          | Zone        | 3.457  | 0.326      |
|                  | Reserve     | 19.491 | <0.001     |  |          | Reserve     | 18.217 | 0.001      |
| Omnivorous diet  | Elevation   | 0.228  | 0.633      |  | Migrant  | Elevation   | 0.001  | 0.977      |
|                  | Zone        | 4.473  | 0.215      |  |          | Zone        | 2.26   | 0.52       |
|                  | Reserve     | 31.435 | <0.001     |  |          | Reserve     | 20.456 | 0.001      |
| Plant/Seed       | Elevation   | 0      | 0.995      |  |          |             |        |            |
|                  | Zone        | 3.672  | 0.299      |  |          |             |        |            |
|                  | Reserve     | 4.118  | 0.39       |  |          |             |        |            |

Figure S1. The number of sites used for analyses. Abbreviations: NL, Nanling National Nature Reserve; CBL, Chebaling National Nature Reserve; SMT, Shimentai National Nature Reserve; XTS, Xiangtou Mountain National Nature Reserve; YKS, Yunkai Mountain National Nature Reserve; Zone1, core zone; Zone2, buffer zone; Zone3, experimental zone; Zone4, reserve boundary area zone (outside of reserve).

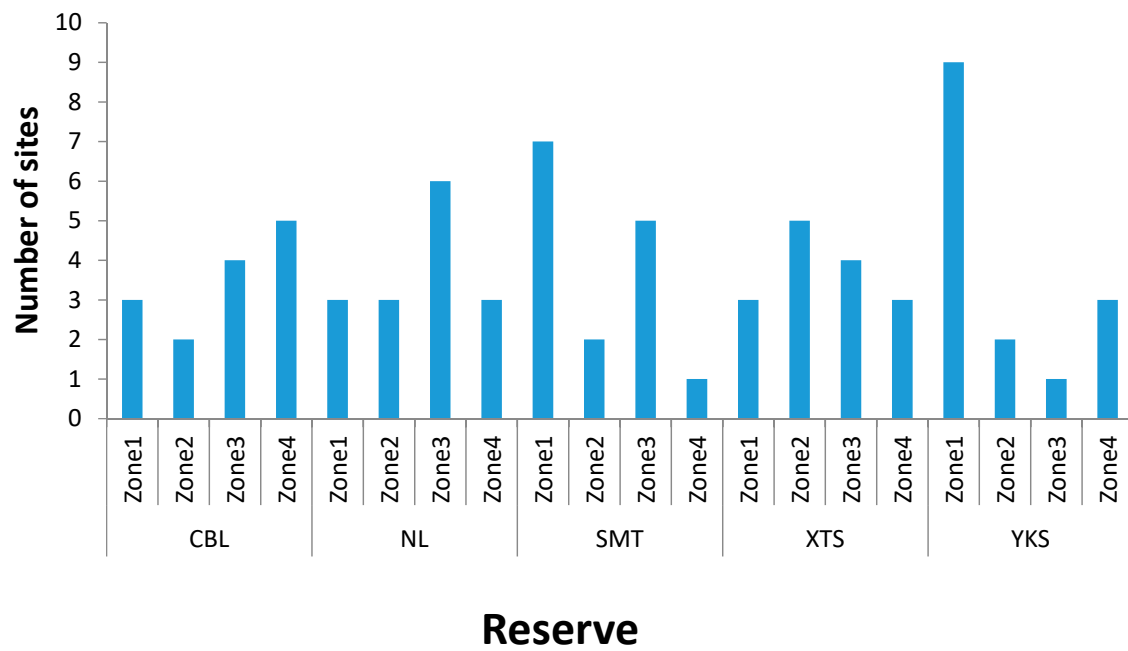

Figure S2. Matrix of species detection/non-detection at each zone and national nature reserve. Asterisk (\*) indicates species detected only at the reserve during survey periods.

### A. Nanling (NL)

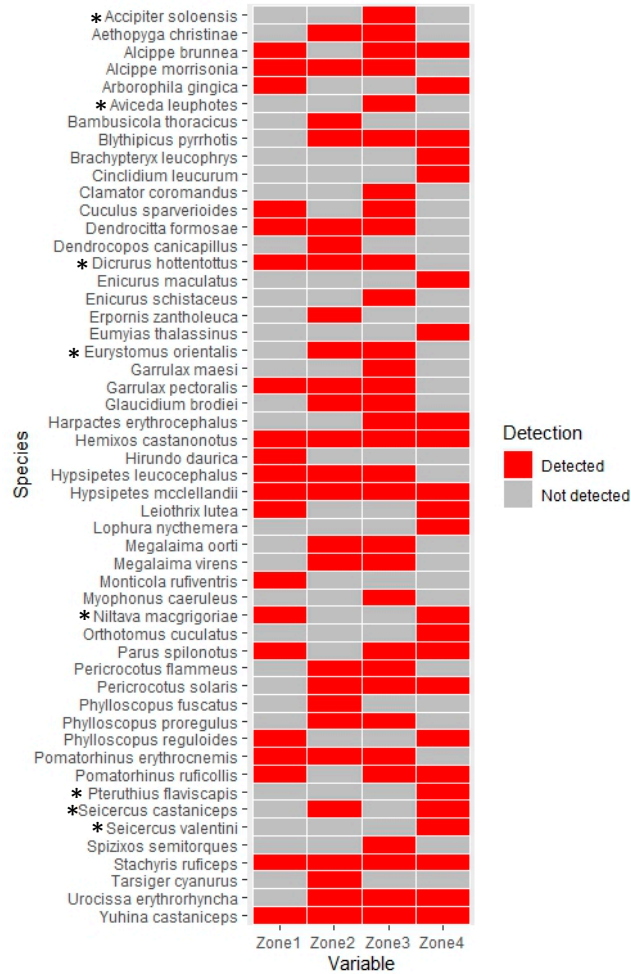

### B. Chebaling (CBL)

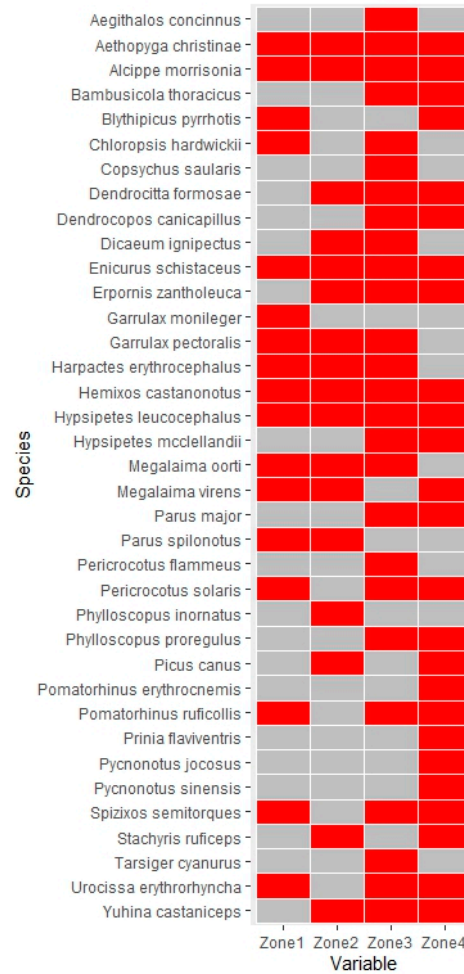

### C. Shimentai (SMT)

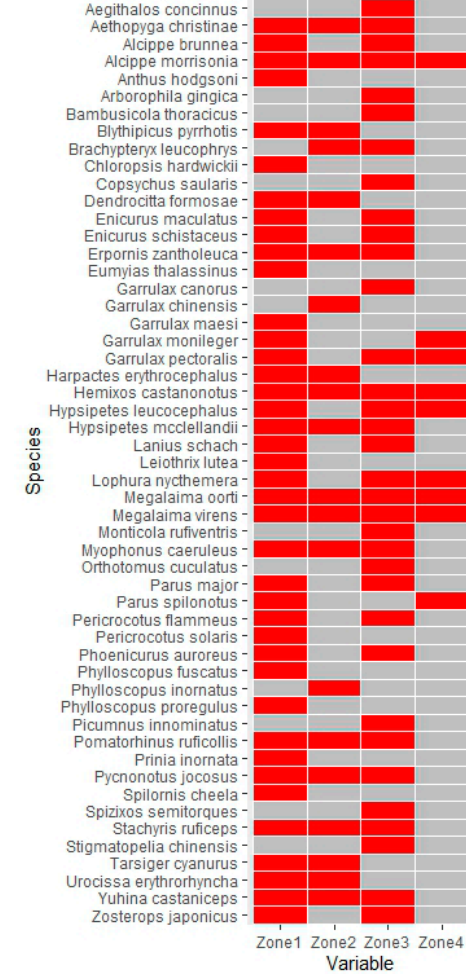



## D. Yunkai Mountain (YKS)

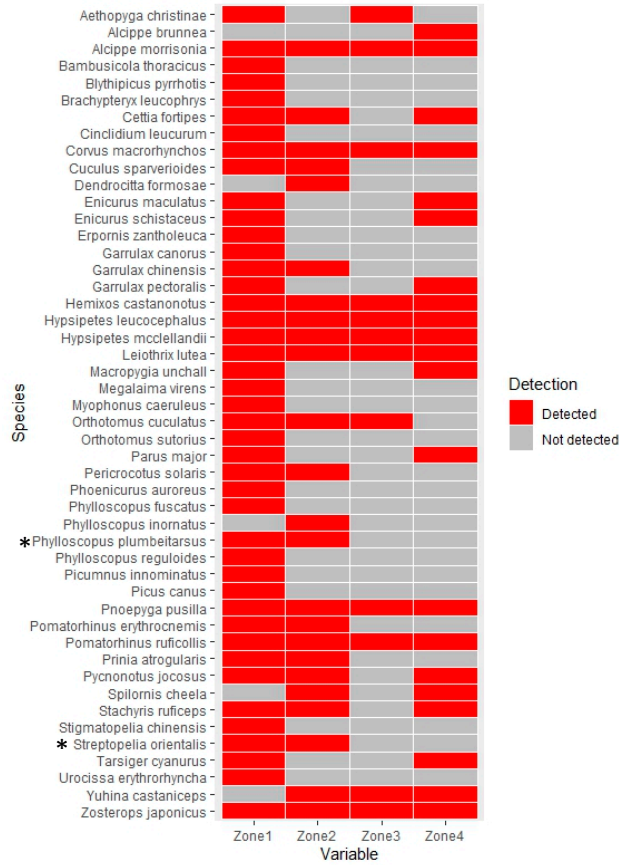

## E. Xiangtou (XTS)

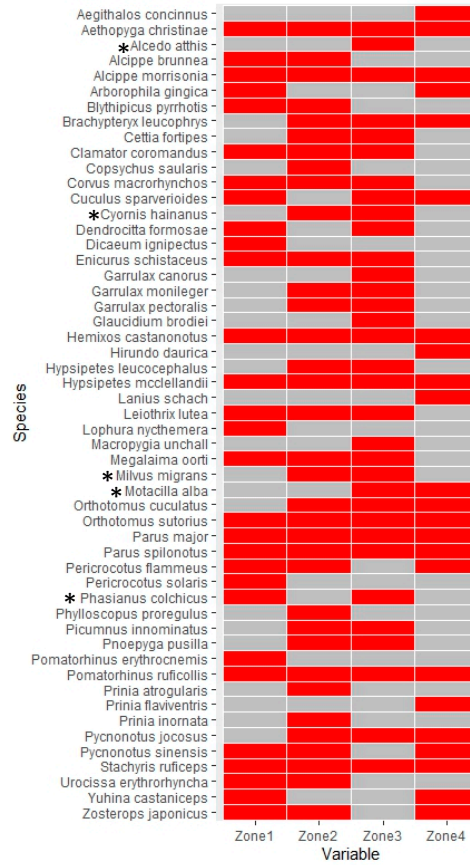

Figure S3. Effects of elevation on the community weighted mean values (CWMs) of frugivore/nectarivore trait (A) and the CWMs of low height foraging trait (B). Elevation of x-axis in A is standardized. Shaded areas on graphs represent 95% confidence intervals.

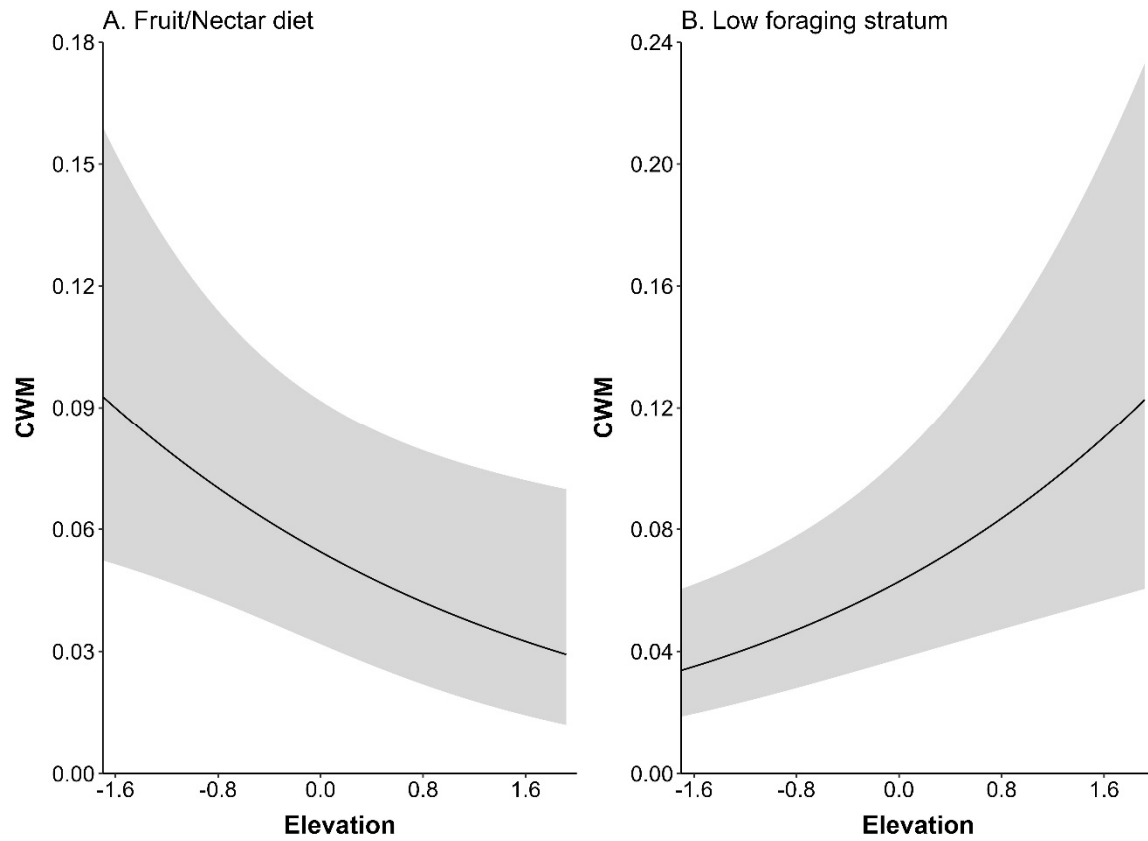

Figure S4. Effects of management zone on species traits (A-I and K) and species richness (J). Abbreviation: Zone1, core area; Zone2, buffer area; Zone3, experimental area; Zone4, reserve boundary area zone (outside of reserve).

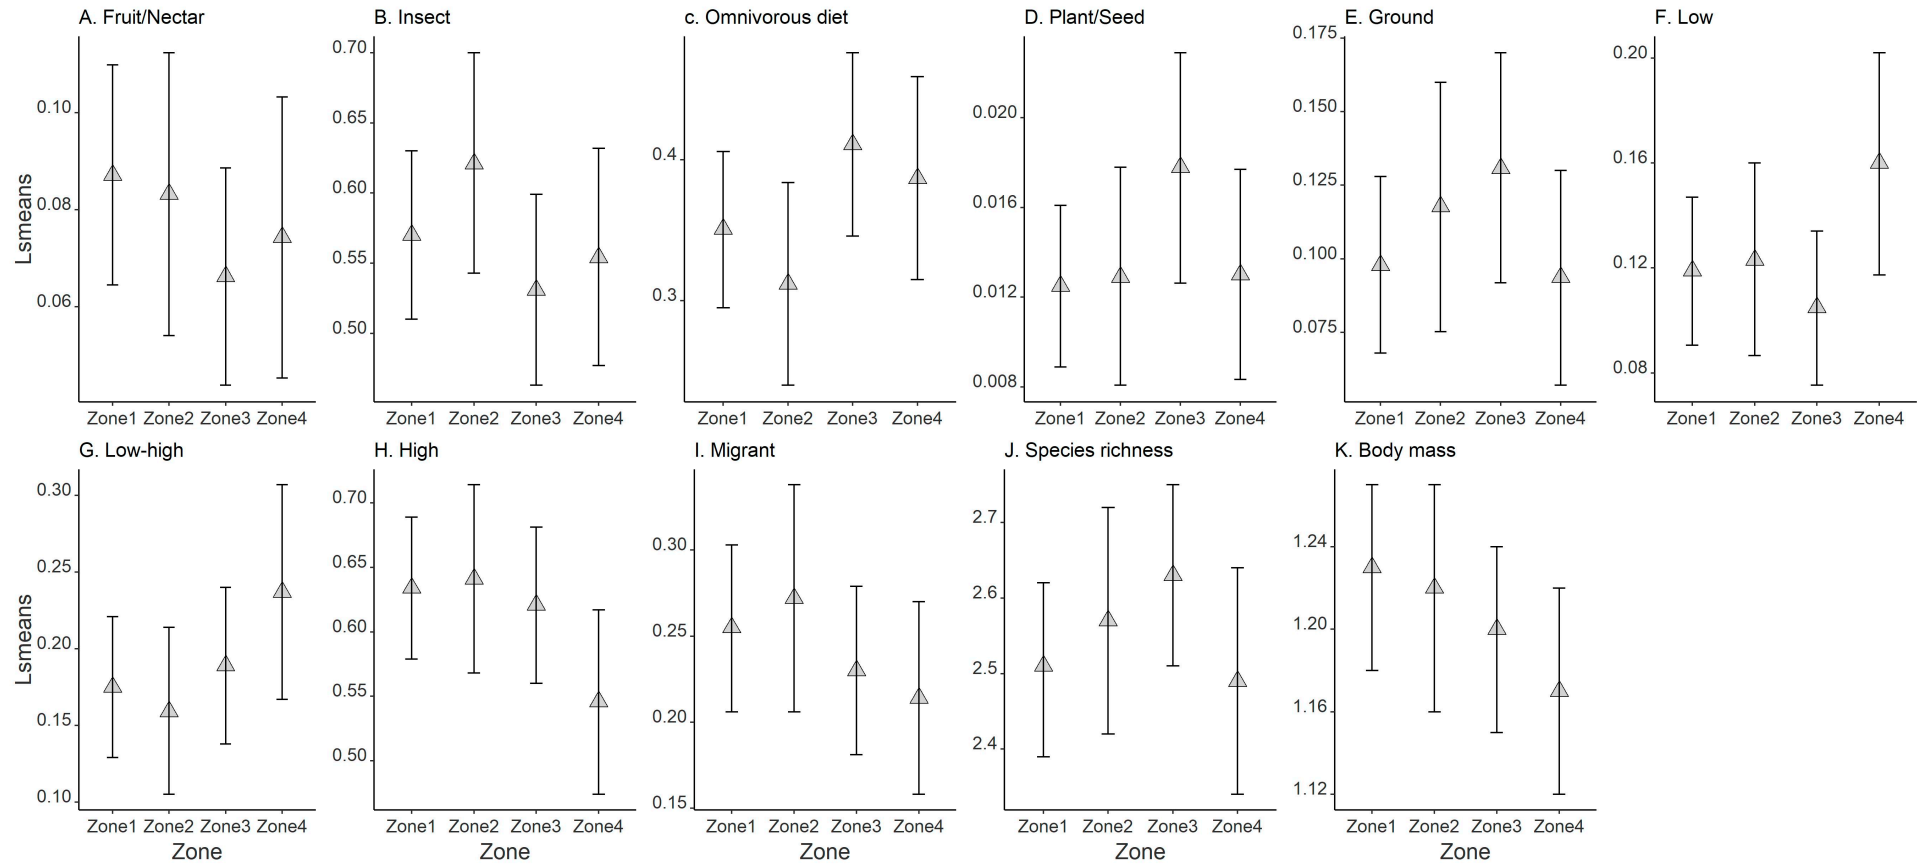

Figure S5. Biplot showing variations in species dissimilarity between reserves: A. dissimilarity matrix accounting for spatial turnover, measured as Jaccard (left) and Bray-Curtis (right) pair-wise dissimilarity (a monotonic transformation of beta diversity); B, dissimilarity matrix accounting for spatial nestedness, as Jaccard (left) and Bray-Curtis (right) pair-wise dissimilarity.

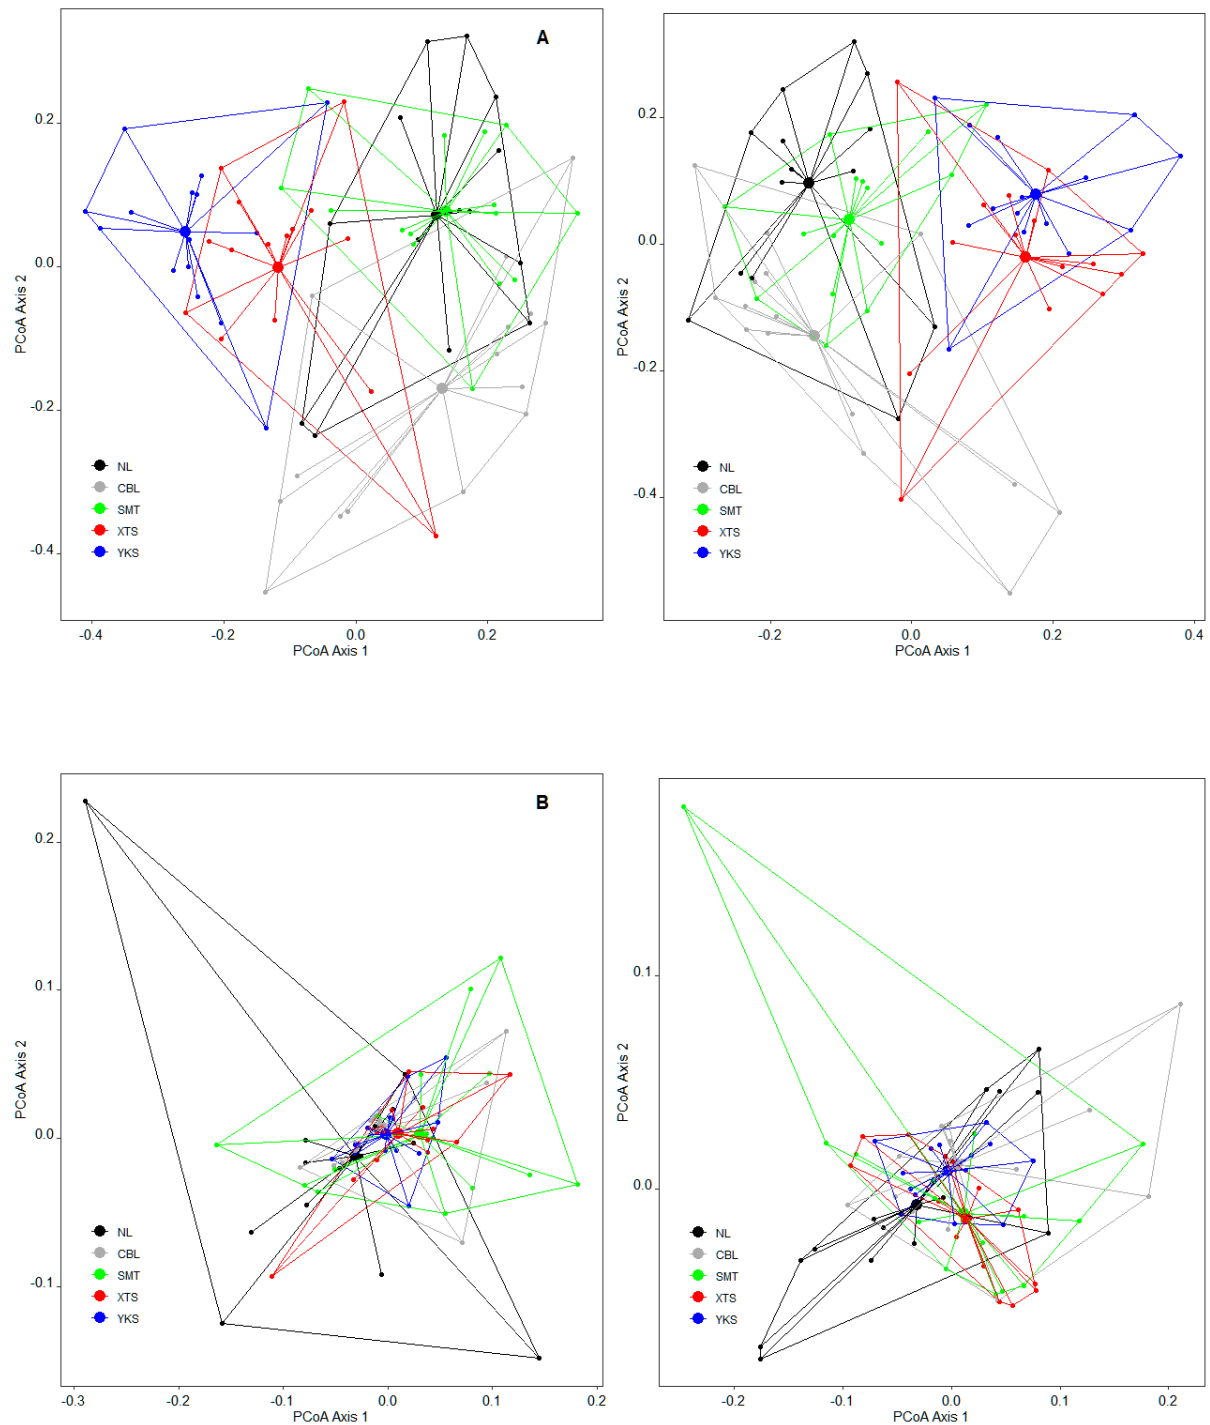

Supplement: s1 [file s1]
